# Supplementary material for: Photocatalytic conversion of carbon dioxide into methanol in reverse fuel cells with tungsten oxide and layered double hydroxide photocatalysts for solar fuel generation
Source: Royal Society of Chemistry journal article supplement (doi:10.1039/c3cy00959a), 2014-01-01
Supplement: c3cy00959a1.pdf [file c3cy00959a1.pdf]

PAPER

Supplementary Information

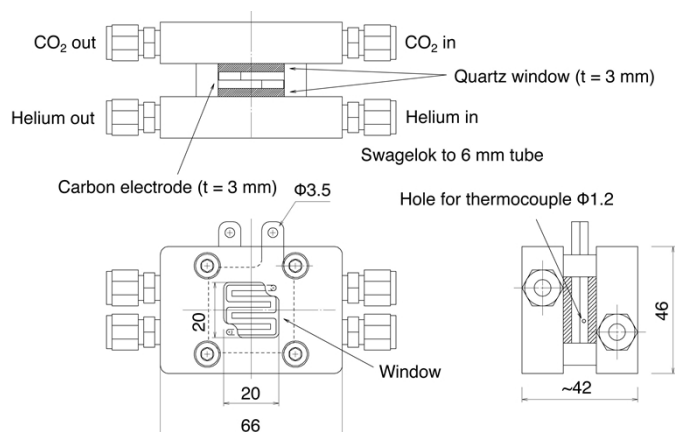

**Figure S1.** The design of photofuel cell-1 based on PEFC.

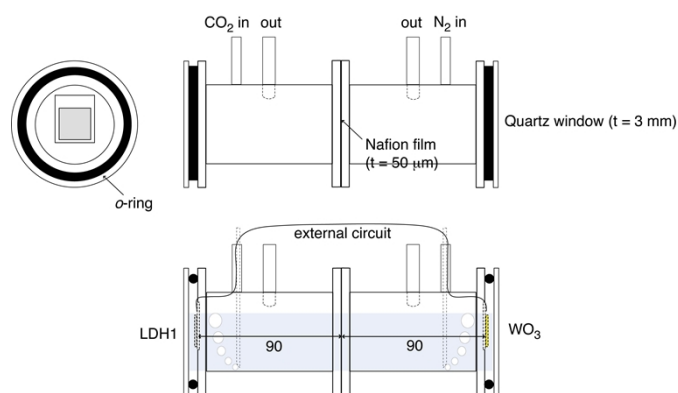

**Figure S2.** The design of photofuel cell-2 (larger type).
